# Supplementary material for: Multi-channel exciton dissociation in D18/Y6 complexes for high-efficiency organic photovoltaics
Source: Royal Society of Chemistry journal article supplement (doi:10.1039/d0ta07996k), 2020-01-01
Supplement: d0ta07996k1.pdf [file d0ta07996k1.pdf]

## Supporting Information

### **Multi-channel exciton dissociation in the D18/Y6 complexes for high-efficiency organic photovoltaics**

Zhixing Cao,<sup>a#</sup> Shu Yang,<sup>a#</sup> Bo Wang,<sup>a</sup> Xingxing Shen,<sup>a,\*</sup> Guangchao Han,<sup>b</sup> Yuanping Yi<sup>b,\*</sup>

<sup>a</sup>College of Chemical Engineering, Hebei Normal University of Science & Technology, Qinhuangdao 066004, China

<sup>b</sup>Beijing National Laboratory for Molecular Sciences, CAS Key Laboratory of Organic Solids, Institute of Chemistry, Chinese Academy of Sciences, Beijing 100190, China

## Contents

**Figure S1.** Optimized  $S_0$  geometries for one repeating units of D18, and Y6 with whole alkyls

**Figure S2.** HOMO and LUMO for one, two and three repeating units of D18.

**Figure S3.** Optimized  $S_0$  geometries for two repeating units of D18, and Y6 with methyl.

**Figure S4.** Initial intermolecular configuration for the D18/Y6 complex.

**Figure S5.** Optimized geometries of the  $S_0$ ,  $S_1$  and cationic states for D18.

**Figure S6.** Energy differences between the configurations derived from translation and rotation of Y6 and optimized configuration.

**Figure S7.** Calculated energies of the CT states for the D18/Y6 complex.

**Figure S8.** Gibbs free energies for the exciton dissociation and charge-recombination processes.

**Figure S9.** Evolution of exciton-dissociation rates from the  $S_1$  state of D18 to the  $CT_0$  state.

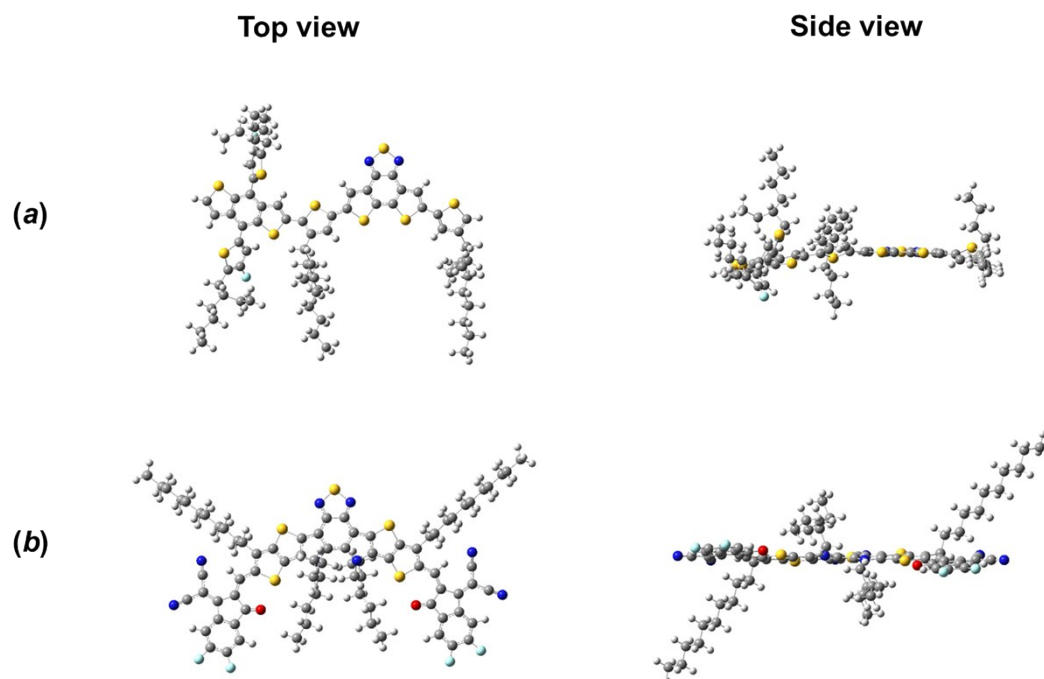

**Figure S1.** Optimized ground geometries for (a) one repeating unit of D18 and (b) Y6 containing whole alkyl groups.

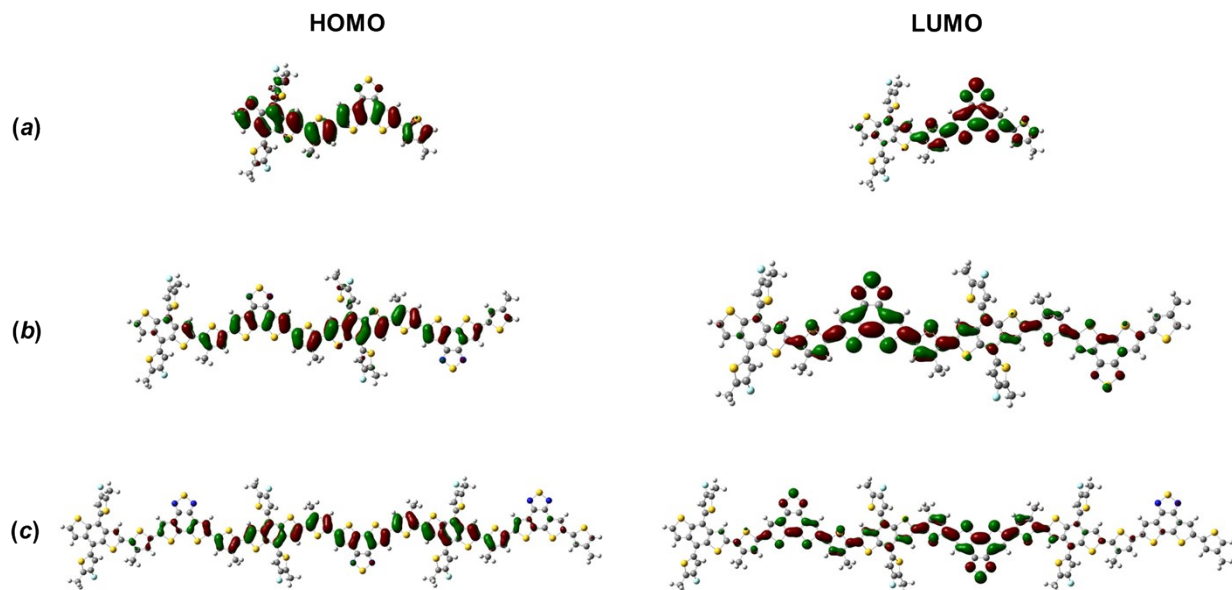

**Figure S2.** HOMO and LUMO for (a) one repeating unit, (b) two repeating units, (c) three repeating units of D18.

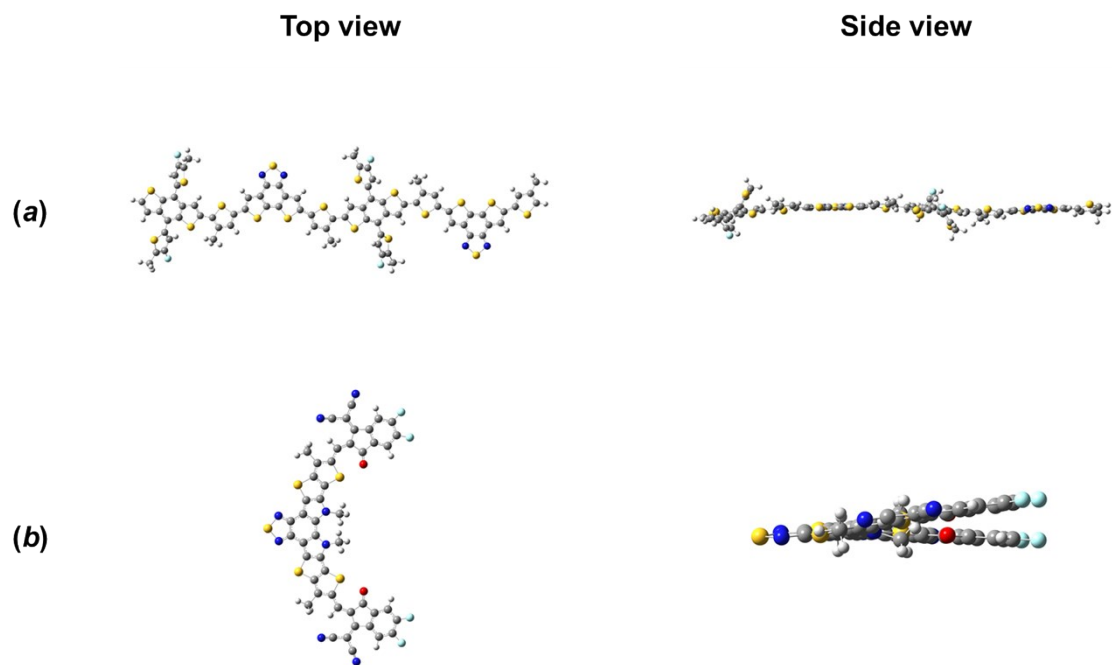

**Figure S3.** Optimized ground geometries for (a) two repeating units of D18 and (b) Y6 where alkyl groups are all replaced by methyl.

**Top view**

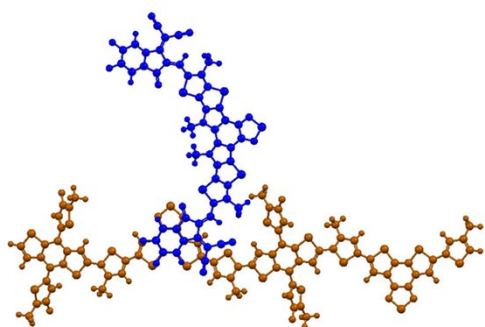

**Side view**

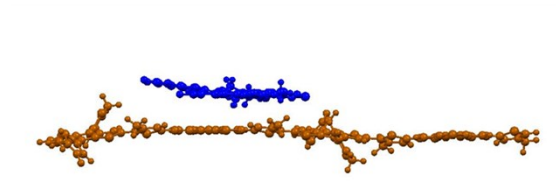

**Figure S4.** Initial intermolecular configuration of the D18/Y6 complex.

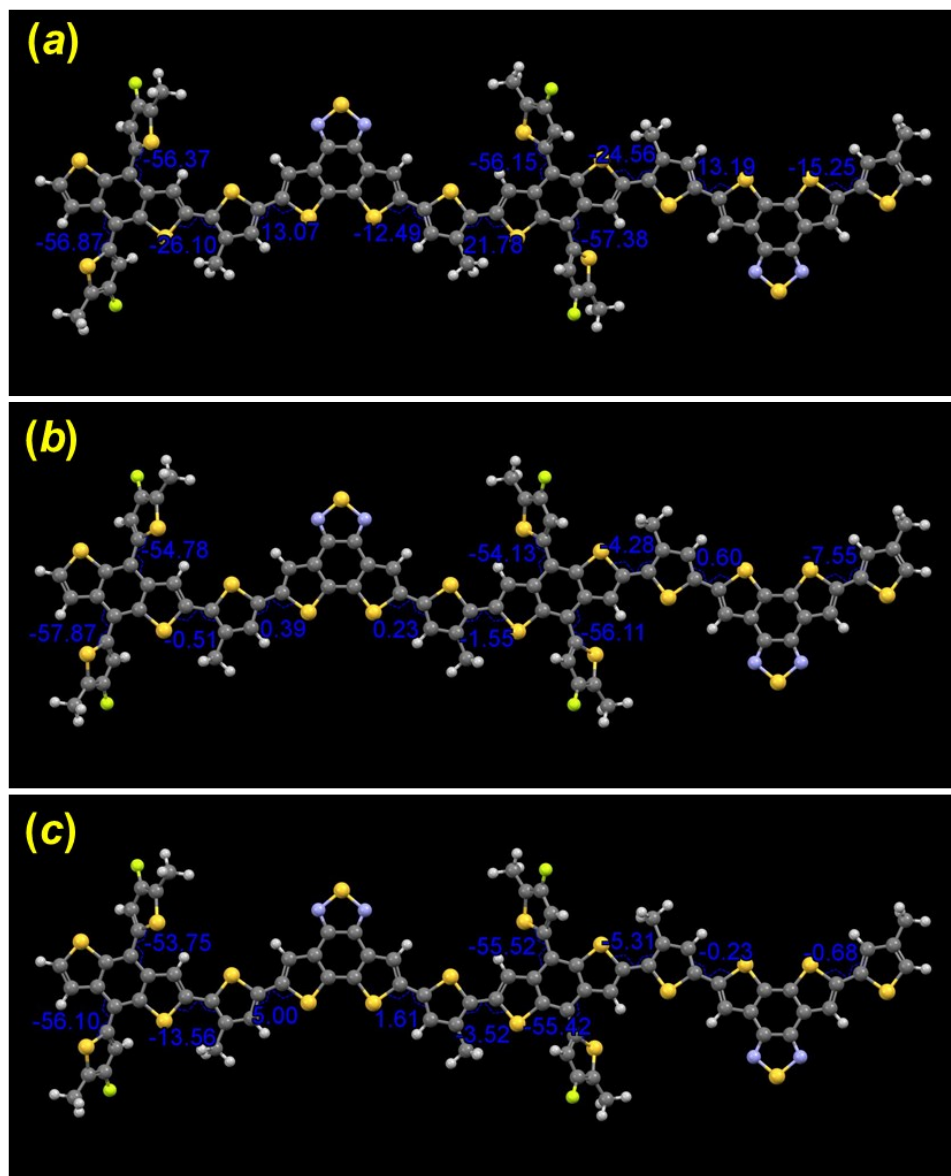

**Figure S5.** Optimized geometries of the (a)  $S_0$ , (b)  $S_1$ , and (c) cationic states for D18.

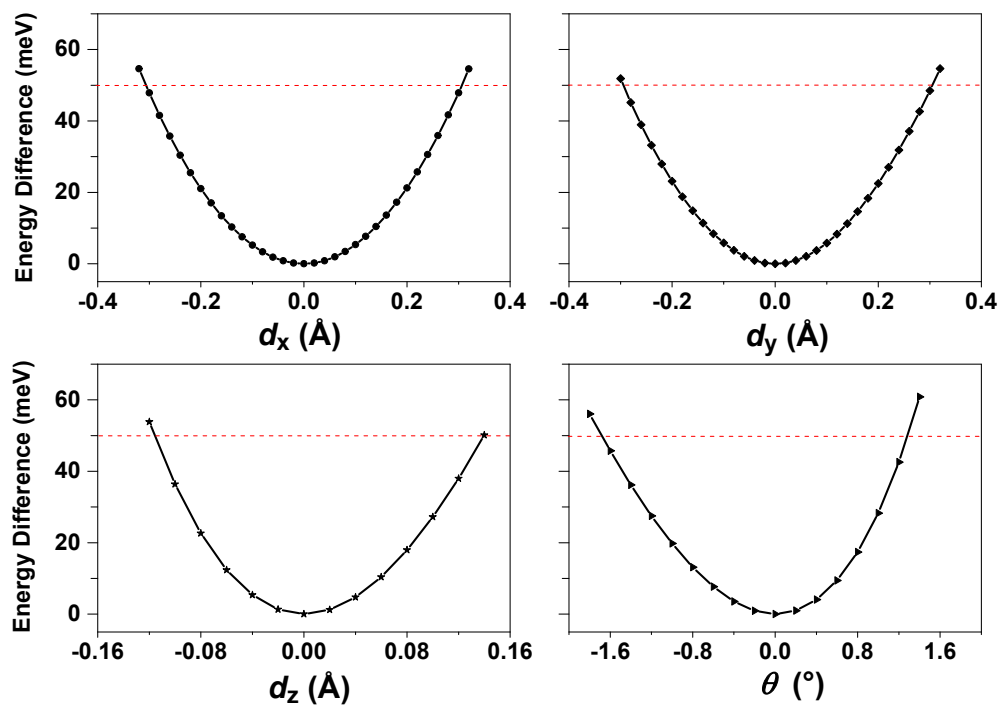

**Figure S6.** Energy differences between the configurations derived from translation ( $d_x$ ,  $d_y$ ,  $d_z$ ) and rotation ( $\theta$ ) of Y6 and the optimized configuration.



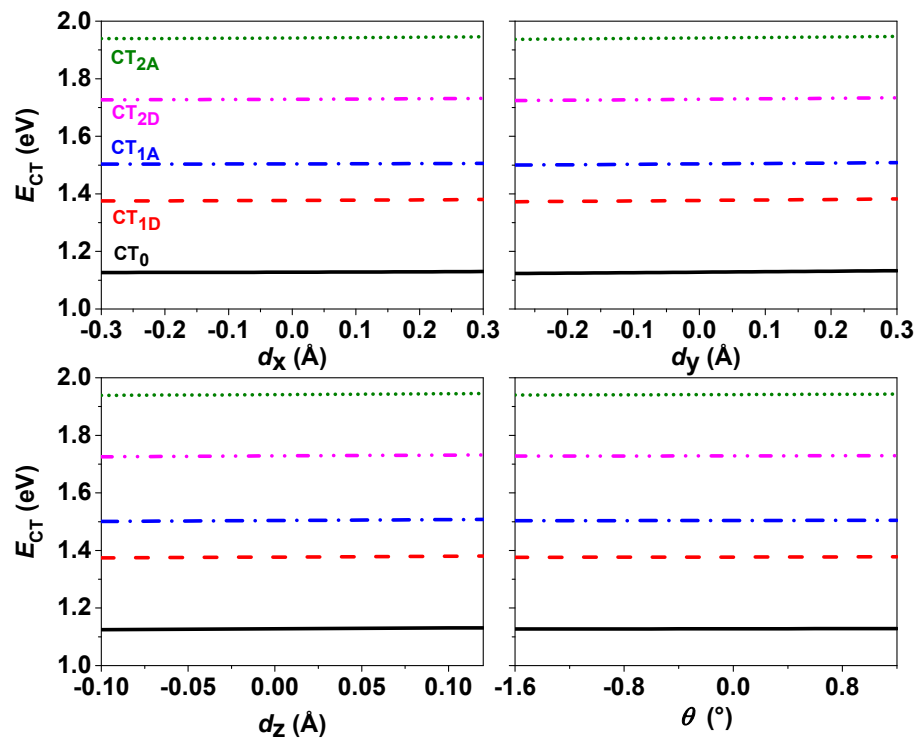

**Figure S7.** Calculated energies of the CT<sub>0</sub>, CT<sub>1D</sub>, CT<sub>1A</sub>, CT<sub>2D</sub> and CT<sub>2A</sub> states as a function of  $d_x$ ,  $d_y$ ,  $d_z$ , and  $\theta$  for the D18/Y6 complex.

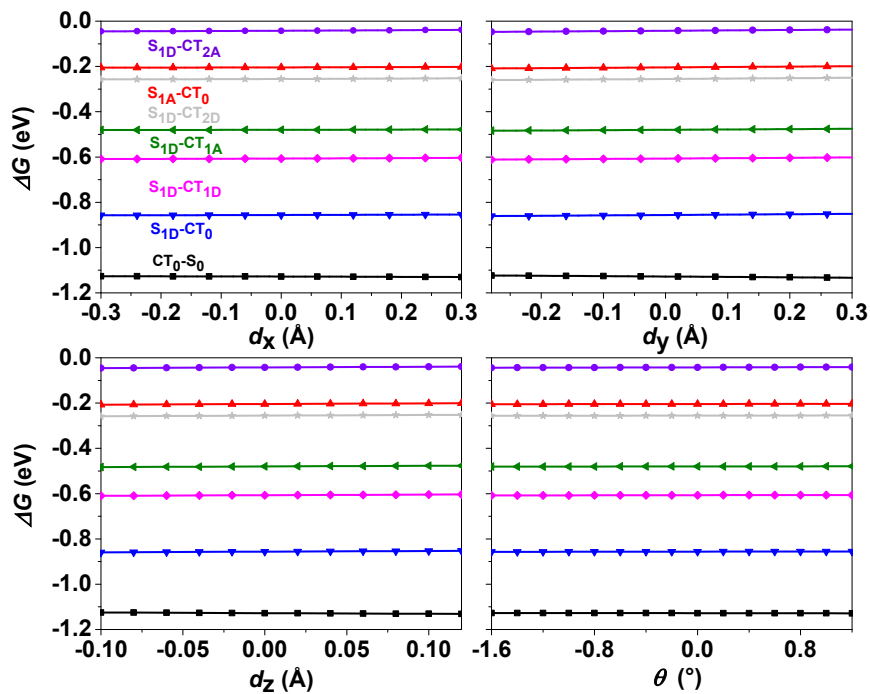

**Figure S8.** Gibbs free energies for exciton dissociation from the  $S_1$  state of Y6 ( $S_{1A}$ ) and D18 ( $S_{1D}$ ) to the  $CT_0$ ,  $CT_{1D}$ ,  $CT_{1A}$ ,  $CT_{2D}$ , and  $CT_{2A}$  states, and charge recombination from the  $CT_0$  to  $S_0$  state as a function of  $d_x$ ,  $d_y$ ,  $d_z$ , and  $\theta$  for the D18/Y6 complex.

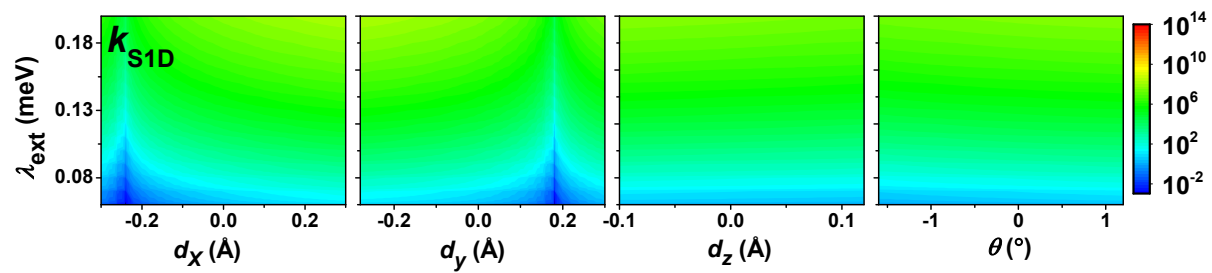

**Figure S9.** Evolution of the rates ( $\text{s}^{-1}$ ) for exciton dissociation from the  $S_1$  state of D18 to  $\text{CT}_0$

( $k_{\text{S1D}}$ ) as a function of  $d_x$ ,  $d_y$ ,  $d_z$ , and  $\theta$  for the D18/Y6 complex.
